# Supplementary material for: Water-stable perovskite nanotube array with enhanced transport of charge carriers induced by functionalized polyoxometalate for the highly efficient photoreduction of uranium(vi)
Source: Royal Society of Chemistry journal article supplement (doi:10.1039/d4qi02393e), 2024-11-14
Supplement: d4qi02393e1.pdf [file d4qi02393e1.pdf]

## Supporting Information

### **Water-stable perovskite nanotube array with enhanced transport of charge carriers induced by functionalized polyoxometalate for highly-efficient photoreduction of uranium(VI)**

Yanli Yang<sup>a#</sup>, Keke Guo<sup>a,b#</sup>, Xue Bai<sup>a</sup>, Maochun Zhu<sup>a</sup>, Siyue Wang<sup>a</sup>, and Shuxia Liu<sup>a\*</sup>

*<sup>a</sup>Key Laboratory of Polyoxometalate and Reticular Material Chemistry of Ministry of Education, Faculty of Chemistry, Northeast Normal University, Changchun, Jilin 130024, P. R. China*

*<sup>b</sup>Key Laboratory of Eco-Functional Polymer Materials of the Ministry of Education, College of Chemistry and Chemical Engineering, Northwest Normal University, Lanzhou, Gansu 730070, P.R. China*

*#Y. Yang and K. Guo contributed equally to this work.*

*Email: [liusx@nenu.edu.cn](mailto:liusx@nenu.edu.cn)*

---

\* Correspondence to S. L., Email: [liusx@nenu.edu.cn](mailto:liusx@nenu.edu.cn)

## Experimental

### Materials and methods.

All chemical reagents and solvents were available commercially and used without further purification.  $\text{PbBr}_2$  (99.99%) and hexamethylenetetramine hydrobromide (HMTA) (99%) were purchased from Energy Chemical.  $\text{H}_3\text{PW}_{12}\text{O}_{40}$  (99%) and Stearyltrimethylammonium Bromide (STAB, 99%) were purchased from Aladdin.

Metal elemental analyses were collected by a Leaman inductively coupled plasma (ICP) spectrometer. Powder X-ray diffraction (PXRD) patterns were recorded using  $\text{Cu K}\alpha$  radiation ( $\lambda = 1.54056 \text{ \AA}$ ) in the range  $2\theta = 5\text{-}50^\circ$  at 293 K on a Philips X'Pert-MPD instrument. IR spectrum was recorded on an Alpha Centaur FT/IR spectrometer using a KBr pellet in the frequency range of  $2000\text{-}600 \text{ cm}^{-1}$ . X-ray photoelectron spectroscopy (XPS) spectra was recorded on a Thermo X-ray photoelectron spectrometer. Raman spectra were performed by a high-resolution laser Raman spectrometer (Horiba LabRAM HR Evolution). The morphologies and EDS mapping of the samples were performed on a field emission scanning electron microscope (Hitachi SU-8000 FE-SEM). The solid diffuse reflectance UV-vis spectra of compound 1 was measured on a Cary7000 UV-Vis-NIR Spectrophotometer from 200 to 800 nm at room temperature. A barium sulfate ( $\text{BaSO}_4$ ) pellet was used as the standard with 100% reflectance. The steady-state photoluminescence (PL) emission spectroscopy and time-resolved photoluminescence (TRPL) spectra were measured by FLS980 with a 375 nm and 470 nm excitation light, respectively. The photoelectrochemical experiments were performed using a CHI 660 electrochemical workstation (Shanghai Chenhua

Instrument Corp. China) at room temperature. A three-electrode system was employed in a quartz cell with a Pt wire as the counter electrode, a saturated calomel electrode (SCE) as the reference electrode, and the composite film-assembled FTO glass as the working electrode. The illumination area of working electrodes was set constant at  $1.0 \times 1.0 \text{ cm}^2$ . The transient photocurrent experiment was carried out at a constant bias of 0.5 V under simulated sunlight irradiation conditions (300 W Xenon arc lamp, AM 1.5G,  $100 \text{ mW} \cdot \text{cm}^{-2}$ ) upon on-off cycling irradiation. Mott-Schottky plots was collected by measuring Impedance-Potential curves at the fixed frequency of 1000 Hz. The obtained potential (vs. SCE) was converted to  $E_{\text{RHE}}$  ( $E_{\text{NHE}}$  at pH = 0) by the equation  $E_{\text{RHE}} = E_{\text{SCE}} + 0.0592\text{pH} + 0.241$ . The space charge-limited currents (SCLC) measurements were obtained by measuring the I-V curves using a Keithley 2400 source measure unit instrument (Tektronix) using electron-only device.

#### **Fabrication of $(\text{HMTA})_3\text{Pb}_2\text{Br}_7@ \text{STA-PW}_{12}$ and $(\text{HMTA})_3\text{Pb}_2\text{Br}_7$ electron-only devices.**

First, 200 mg of  $(\text{HMTA})_3\text{Pb}_2\text{Br}_7@ \text{STA-PW}_{12}$  and  $(\text{HMTA})_3\text{Pb}_2\text{Br}_7$  samples were ground into powder. Then, wafers (diameter: 13 mm) were obtained by processing in a machine for 8 min at 280 MPa. Electron-transporting layers were constructed on the both surface of these two wafers by depositing 8 nm BCP, followed by depositing 20 nm Cu cathode under  $5 \times 10^{-4}$  Pa. Finally, the electron-only device with structure of Cu/BCP/wafer/BCP/Cu was fabricated.

#### **Density functional theory (DFT) calculations**

The calculations were carried out using the DMOL3 (Density Functional Theory based Quantum Chemistry) software package. The Perdew-Burke-Ernzerhof (PBE)

functional was used within the generalized gradient approximation (GGA). The double numerical plus polarization (DNP) basis set was employed for all atoms in the cluster. The orbital cutoff was set to 3.5 Å to ensure accurate treatment of the electron density near the cluster boundary.

The energy convergence criterion was set to  $10 \text{ e}^{-5} \text{ eV/atom}$ , the force convergence criterion was set to  $0.002 \text{ eV/Å}$ , and the maximum displacement criterion for geometry optimization was set to  $0.005 \text{ Å}$ . All calculations included spin polarization to accurately describe the magnetic properties of the system. For the geometry optimization, the BFGS algorithm was used.

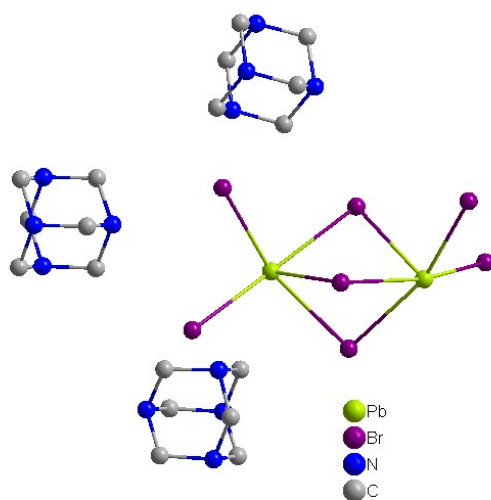

**Fig. S1** basic structural motif of  $(\text{HMTA})_3\text{Pb}_2\text{Br}_7$ .

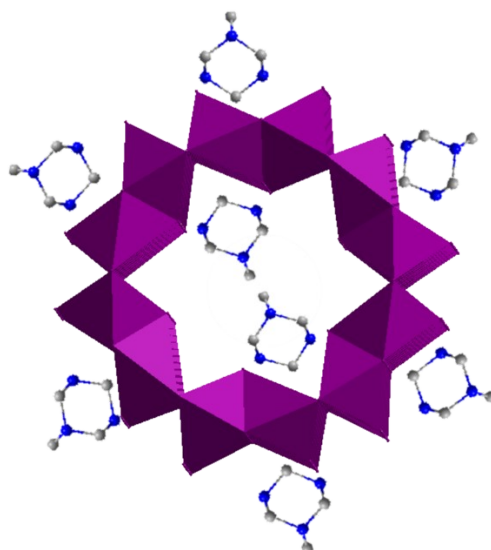

**Fig. S2** Rugged rings of  $(\text{HMTA})_3\text{Pb}_2\text{Br}_7$ .

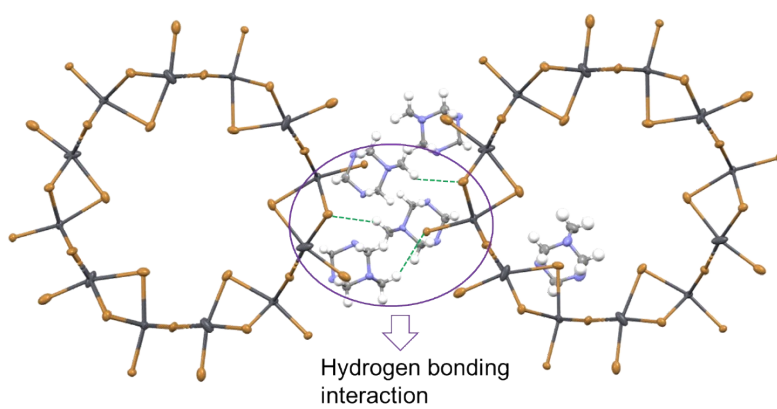

**Fig. S3** Hydrogen bonding interactions between adjacent  $(\text{HMTA})_3\text{Pb}_2\text{Br}_7$ .

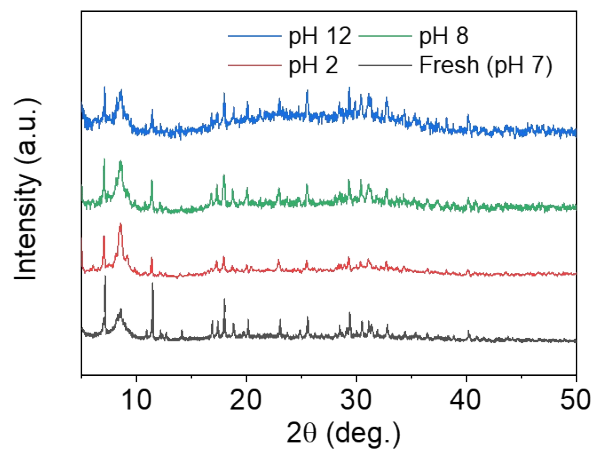

**Fig. S4** PXRD patterns of  $(\text{HMTA})_3\text{Pb}_2\text{Br}_7@ \text{STA-PW}_{12}$  at different pH values.

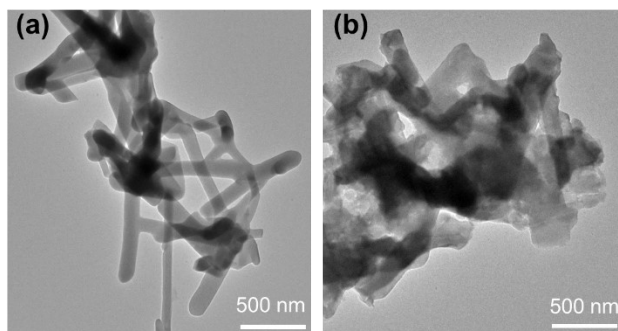

**Fig. S5** TEM images of (a)  $(\text{HMTA})_3\text{Pb}_2\text{Br}_7$  and (b)  $(\text{HMTA})_3\text{Pb}_2\text{Br}_7@ \text{STA-PW}_{12}$ .

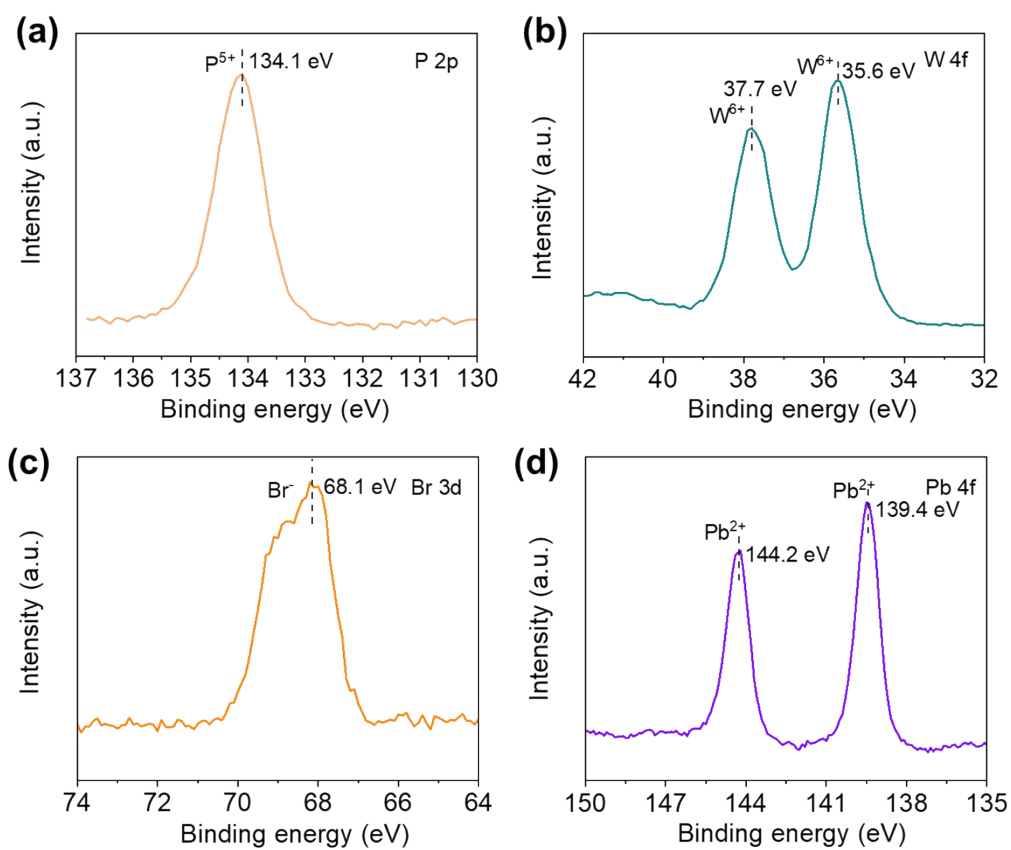

**Fig. S6** High-resolution XPS spectra of (a) P 2p, (b) W 4f, (c) Br 3d, (d) Pb 4f of  $(\text{HMTA})_3\text{Pb}_2\text{Br}_7@ \text{STA-PW}_{12}$ .

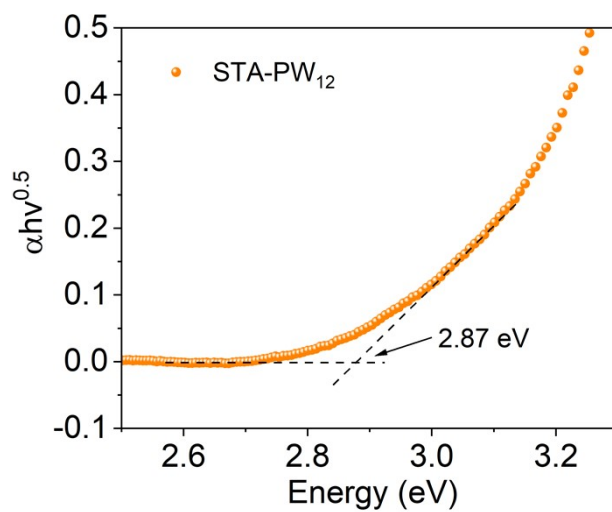

**Fig. S7** Tauc plot of  $\text{STA-PW}_{12}$ .

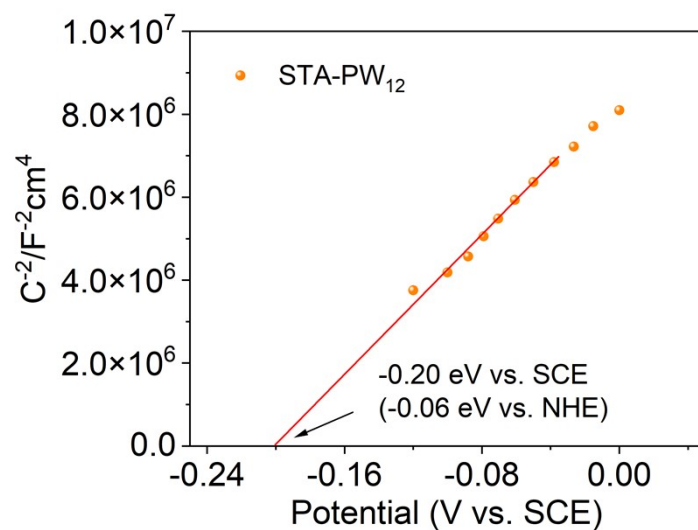

**Fig. S8** Mott-Schottky plot of STA-PW<sub>12</sub>.

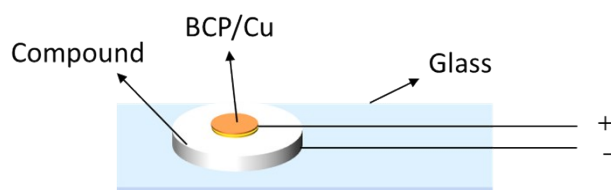

**Fig. S9** Cu/BCP/wafer/BCP/Cu device for (HMTA)<sub>3</sub>Pb<sub>2</sub>Br<sub>7</sub> and (HMTA)<sub>3</sub>Pb<sub>2</sub>Br<sub>7</sub>@STA-PW<sub>12</sub> wafers.



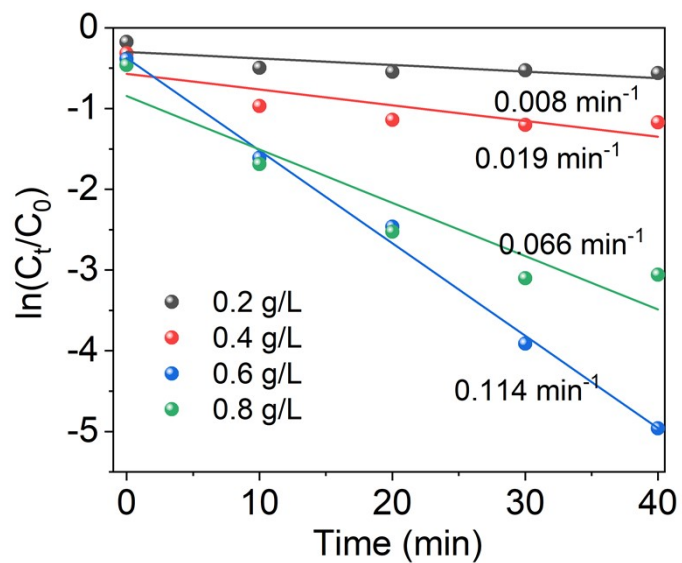

**Fig. S10** Curves of  $\ln(C_t/C_0)$  vs time at different solid-liquid ratio.

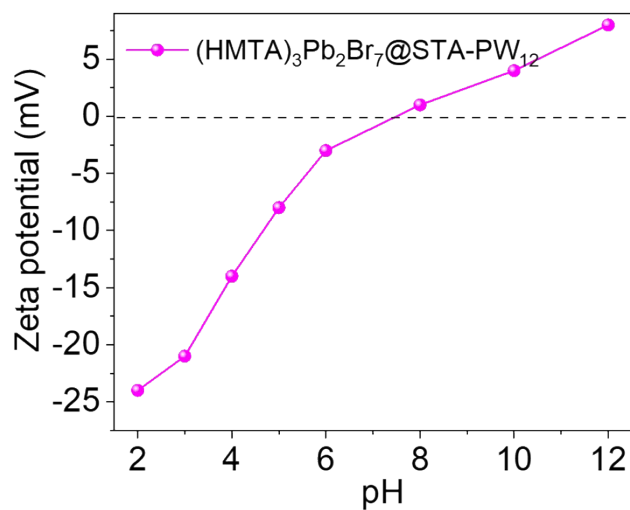

**Fig. S11** Zeta potential of  $(\text{HMTA})_3\text{Pb}_2\text{Br}_7@ \text{STA-PW}_{12}$  at different pH values.

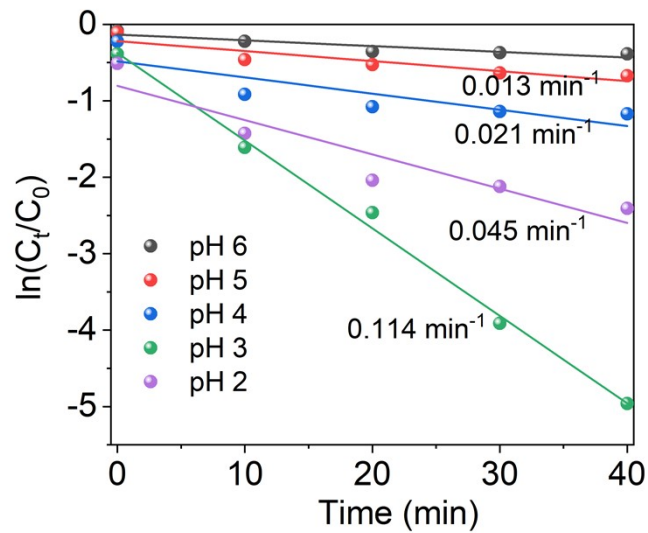

**Fig. S12** Curves of  $\ln(C_t/C_0)$  vs time at different pH values.

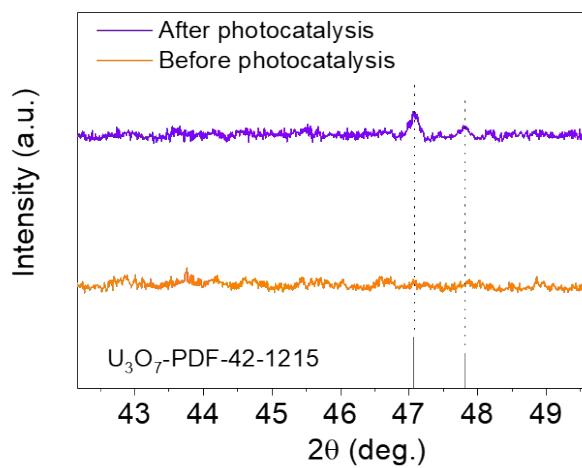

**Fig. 13** PXRD patterns of  $(\text{HMTA})_3\text{Pb}_2\text{Br}_7@(\text{STA-PW})_{12}$  before and after photocatalysis.

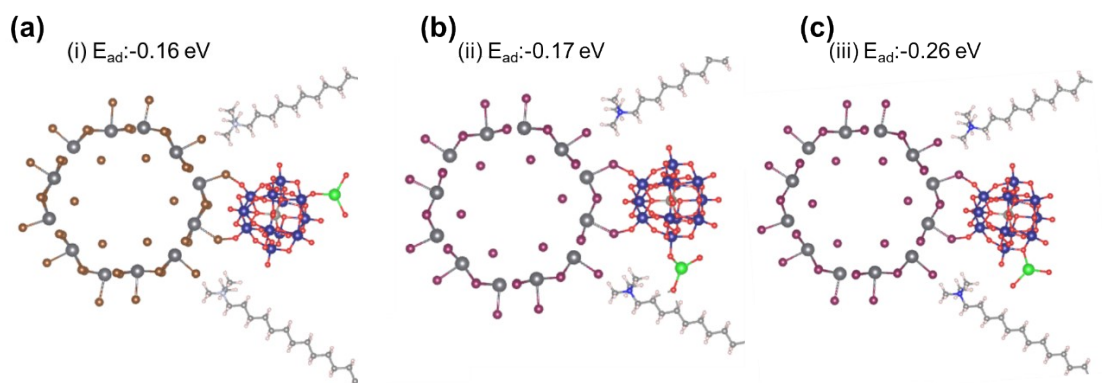

**Fig. S14** Adsorption models for  $\text{UO}_2^{2+}$  on  $(\text{HMTA})_3\text{Pb}_2\text{Br}_7@ \text{STA-PW}_{12}$ .

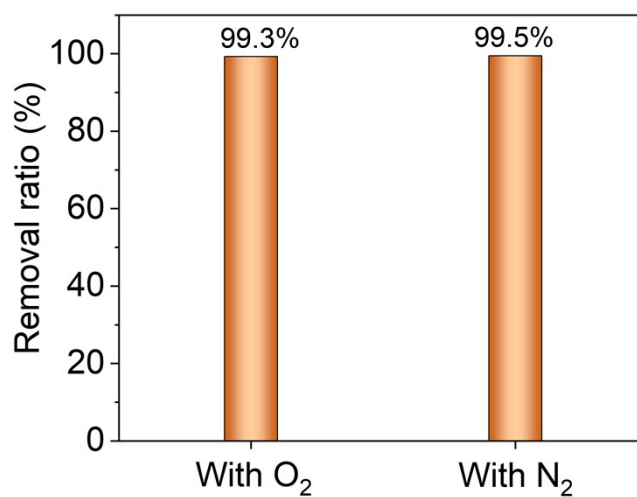

**Fig. S15** Removal ratio of U(VI) under  $\text{O}_2$  and  $\text{N}_2$  atmosphere.

Table S1. Comparison of the durability of  $(\text{HMTA})_3\text{Pb}_2\text{Br}_7@ \text{STA-PW}_{12}$  in water with some selected perovskites.

| Materials                                    | Methods                                   | Medium           | Characterizations | Observed durability | Ref. |
|----------------------------------------------|-------------------------------------------|------------------|-------------------|---------------------|------|
| $\text{MAPbBr}_3/\text{SSD}$<br>C (1.13 wt%) | Physical blending                         | Water            | PL                | 36 h                | 1    |
| $\text{MAPbBr}_3$ -<br>polystyrene           | Swelling-deswelling<br>microencapsulation | Boiling<br>water | PL                | 30 min              | 2    |

|                                                                              |                                                 |                  |      |         |              |
|------------------------------------------------------------------------------|-------------------------------------------------|------------------|------|---------|--------------|
| Polyimide-coated<br>CsPbBr <sub>3</sub> NCs                                  | In situ growth                                  | Water            | PL   | 60 min  | 3            |
| CsPbBr <sub>3</sub> /SiO <sub>2</sub>                                        | Water-triggered<br>transformation               | Hexane/<br>water | PL   | 7 days  | 4            |
| CsPbBr <sub>3</sub> @SiO <sub>2</sub><br>NPs                                 | Modified<br>supersaturated<br>recrystallization | Water            | PL   | 40 min  | 5            |
| Mesoporous<br>SiO <sub>2</sub> -<br>CsPbBr <sub>3</sub> @AlO <sub>x</sub>    | Modified template<br>assisted formation         | Water            | PL   | 8 h     | 6            |
| MAPbBr <sub>3</sub> @SiO <sub>2</sub> /<br>PVDF films                        | Impregnation and<br>physical blending           | Water            | PL   | 2 h     | 7            |
| CsPbBr <sub>3</sub> @ZnO<br>nanoparticles                                    | Physical blending                               | Water            | PL   | 30 min  | 8            |
| Cs <sub>2</sub> Sn <sub>0.89</sub> Te <sub>0.11</sub> Cl <sub>6</sub>        | Hydrothermal method                             | Water            | PXRD | 360 min | 9            |
| (HMTA) <sub>3</sub> Pb <sub>2</sub> Br <sub>7</sub><br>@STA-PW <sub>12</sub> | Conventional<br>solution method                 | Water            | PXRD | 10 h    | This<br>work |

## References

- [1] H. Wang, H. Lin, X. Piao, P. Tian, M. Fang, X. An, C. Luo, R. Qi, Y. Chen and H. Peng, Organometal halide perovskite nanocrystals embedded in silicone resins with bright luminescence and ultrastability, *J. Mater. Chem. C*, 2017, 5, 12044–12049.
- [2] Y. Wang, J. He, H. Chen, J. Chen, R. Zhu, P. Ma, A. Towers, Y. Lin, A. J. Gesquiere, S. Wu and Y. Dong, Ultrastable, Highly Luminescent Organic–Inorganic Perovskite–Polymer Composite Films, *Adv. Mater.*, 2016, 28, 10710–10717.
- [3] J. Zhang, P. Jiang, Y. Wang, X. Liu, J. Ma and G. Tu, In Situ Synthesis of Ultrastable CsPbBr<sub>3</sub> Perovskite Nanocrystals Coated with Polyimide in a CSTR System, *ACS Appl. Mater. Interfaces*, 2020, 12, 3080-3085.

- [4] H. Hu, L. Wu, Y. Tan, Q. Zhong, M. Chen, Y. Qiu, D. Yang, B. Sun, Q. Zhang and Y. Yin, Interfacial Synthesis of Highly Stable CsPbX<sub>3</sub>/Oxide Janus Nanoparticles, *J. Am. Chem. Soc.*, 2018, 140, 406–412.
- [5] Q. Zhong, M. Cao, H. Hu, D. Yang, M. Chen, P. Li, L. Wu and Q. Zhang, One-Pot Synthesis of Highly Stable CsPbBr<sub>3</sub>@SiO<sub>2</sub> Core-Shell Nanoparticles, *ACS Nano*, 2018, 12, 8579-8587.
- [6] C.-Y. You, F.-M. Li, L.-H. Lin, J.-S. Lin, Q.-Q. Chen, P. M. Radjenovic, Z.-Q. Tian and J.-F. Li, Ultrastable monodispersed lead halide perovskite nanocrystals derived from interfacial compatibility, *Nano Energy*, 2020, 71, 104554.
- [7] Y. Huang, F. Li, L. Qiu, F. Lin, Z. Lai, S. Wang, L. Lin, Y. Zhu, Y. Wang, Y. Jiang and X. Chen, Enhancing the Stability of CH<sub>3</sub>NH<sub>3</sub>PbBr<sub>3</sub> Nanoparticles Using Double Hydrophobic Shells of SiO<sub>2</sub> and Poly(vinylidene fluoride), *ACS Appl. Mater. Interfaces*, 2019, 11, 26384–26391.
- [8] P. Song, B. Qiao, D. Song, J. Cao, Z. Shen, G. Zhang, Z. Xu, S. Zhao, S. Wageh and A. Al-Ghamdi, Enhancing the stability and water resistance of CsPbBr<sub>3</sub> perovskite nanocrystals by using tetrafluoride and zinc oxide as protective capsules, *J. Mater. Sci.*, 2020, 55, 9739–9747.
- [9] Z. Tan, Y. Chu, J. Chen, J. Li, G. Ji, G. Niu, L. Gao, Z. Xiao and J. Tang, Lead-Free Perovskite Variant Solid Solutions Cs<sub>2</sub>Sn<sub>1-x</sub>Te<sub>x</sub>Cl<sub>6</sub>: Bright Luminescence and High Anti-Water Stability, *Adv. Mater.*, 2020, 32, 2002443.
